# Supplementary material for: TNFα Impairs Rhabdoviral Clearance by Inhibiting the Host Autophagic Antiviral Response
Source: PLoS Pathog. 2016 Jun 28;12(6):e1005699. doi: 10.1371/journal.ppat.1005699 (PMC4924823; doi:10.1371/journal.ppat.1005699)
Supplement: S1 Table — The gene symbols followed the Zebrafish Nomenclature Guidelines http://zfin.org/zf_info/nomen.html). ENA, European Nucleotide Archive. (DOCX) [file ppat.1005699.s001.docx]

| **Gene** | **ENA or ENSEMBL accession numbers** | **Nucleotide sequence (5’→3’)** | | **Use** |
| --- | --- | --- | --- | --- |
| **ZEBRAFISH PRIMERS** | | | | |
| *mxb* | NM_001128672 |  | AATGGTGATCCGCTATCTGC | RT-qPCR, gene expression |
|  | TCTGGCGGCTCAGTAAGTTT |
| *mxc* | NM_001007284 |  | GAGGCTTCACTTGGCAACTC |
|  | TTGTTCCAATAAGGCCAAGC |
| *pkz* | NM_001040376 |  | GGAGCACCGTACAGGACATT |
|  | CTCGGGCTTTATTTGCTCTG |
| *rsad2* | EF014961 |  | AGCAGATCACCGCTCTCAAT |
|  | CCAGACACTGGATGCTCTGA |
| *rps11* | NM_213377 |  | TAAGAAATGCCCCTTCACTG |
|  | GTCTCTTCTCAAAACGGTTG |
| *tnfa* | ENSDARG00000009511 |  | GCGCTTTTCTGAATCCTACG | RT-qPCR, *tnfa* validation |
|  | TGCCCAGTCTGTCTCCTTCT |
|  | TGGATGAAGCTTGAGAGTCGGGG | RT-PCR, MO validation |
|  | TGCCCAGTCTGTCTCCTTCT |
| *tnfr1* | ENSDARG00000018569 |  | AAAGGATCCTGGATGAGGATATGTCAACTGACC |
|  | TGCTGGTTTTGCATAGGTGA |
| *tnfr2* | ENSDARG00000070165 |  | AAAGGATCCTGGATGACGGTGGTGTGGCTCTTGGCG |
|  | AAAGGGCCCGGGTCAGGCGGAGGGTTGCTTCGGATC |
|  | GAAGGAAAGATTCCTCCGCCA | RT-qPCR, *DN-tnfr2* validation |
|  | GTCCCTGGTTTGCATCTACTGCA |
| **SVCV PRIMERS** | | | | |
| *N protein* | NC_002803 | TGAGGTGAGTGCTGAGGATG | | RT-qPCR,  viral load (RNA+) |
| CCATCAGCAAAGTCCGGTAT | |
| *G protein* | NC_002803 | TACAGATTCGGGGGATCTTG | | RT-qPCR,  viral load (RNA-) |
| ACCAACGTTCCATCAACACA | |
